# Supplementary material for: BCN monolayer for high capacity Al-based dual-ion batteries
Source: Royal Society of Chemistry journal article supplement (doi:10.1039/d0ma00501k), 2020-01-01
Supplement: d0ma00501k1.pdf [file d0ma00501k1.pdf]

## SUPPLEMENTARY INFORMATION

### **BCN Monolayer for High Capacity Al based Dual-Ion Batteries**

Hariom Saini<sup>a</sup>, Sandeep Das<sup>a</sup> and Biswarup Pathak<sup>a\*</sup>

<sup>a</sup>Discipline of Chemistry, Indian Institute of Technology (IIT) Indore, Simrol, Indore 453552, India

\*Email: [biswarup@iiti.ac.in](mailto:biswarup@iiti.ac.in)

## Contents

**Fig. S1** Total energy vs time plot for AIMD simulations of the BCN monolayer at (a) 300 K and (b) 400 K. The side and top views of (c) initial structure (d) structure after 20 ps simulation at 300 K and (e) 400 K.

**Fig. S2** Top view of the  $\text{AlCl}_4$  adsorbed BCN monolayer at (a) B Top, (b) C Top, (c) N Top, (d) B-C Bridge, (e) B-N Bridge, (f) C-N Bridge, (g) C-C Bridge, (h) C-C-B-N-B-N Hollow and (i) C-B-N-C-B-N Hollow sites.

**Table S1** The relative adsorption energy of  $\text{AlCl}_4$  for all possible adsorption sites available and the average distance of Al of the adsorbed  $\text{AlCl}_4$  from BCN monolayer at each site.

**Fig. S3** Side and top views of the most stable configuration of  $\text{AlCl}_4$  adsorbed BCN monolayer at different  $\text{AlCl}_4$  concentrations (a)  $(\text{AlCl}_4)_4\text{BCN}$  (b)  $(\text{AlCl}_4)_8\text{BCN}$  (c)  $(\text{AlCl}_4)_{12}\text{BCN}$ .

**Fig. S4** Top view of the optimized configuration of 15  $\text{AlCl}_4$  adsorbed BCN monolayer. Inset figure showing side view of  $\text{AlCl}_4$  dissociation.

**Fig. S5** Total and partial density of states of (a) 7  $\text{AlCl}_4$  adsorbed BCN monolayer, (b) 10  $\text{AlCl}_4$  adsorbed BCN monolayer, (c) 14  $\text{AlCl}_4$  adsorbed BCN monolayer. The Fermi level is set at zero.

**Fig. S6** The optimized highest energy transition states for different possible pathways, (a) Path A, (b) Path B, (c) Path C, available for  $\text{AlCl}_4$  diffusion.

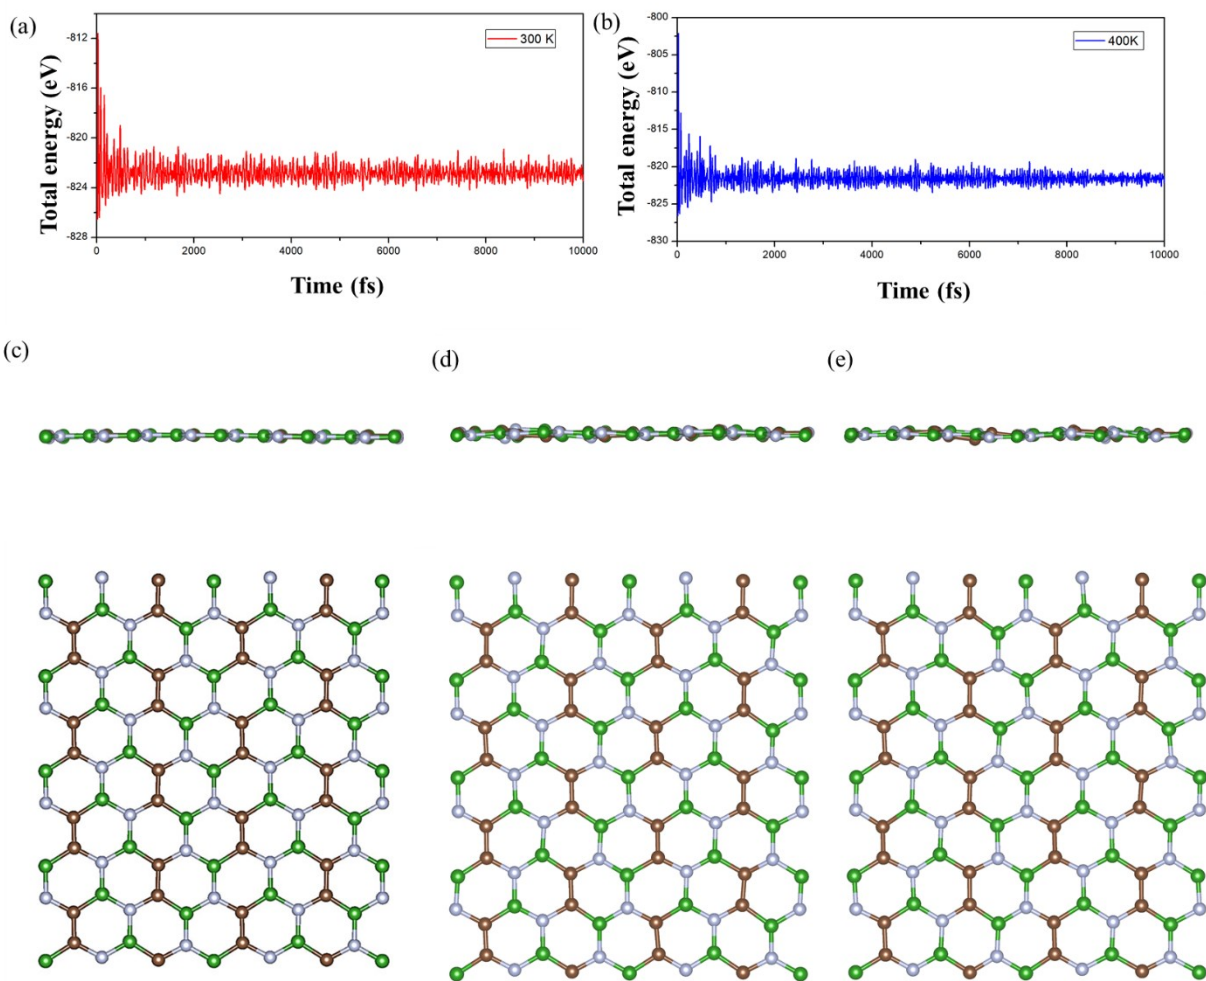

**Fig. S1** Total energy vs time plot for AIMD simulations of the BCN monolayer at (a) 300 K and (b) 400 K. The side and top views of (c) initial structure (d) structure after 20 ps simulation at 300 K and (e) at 400 K.

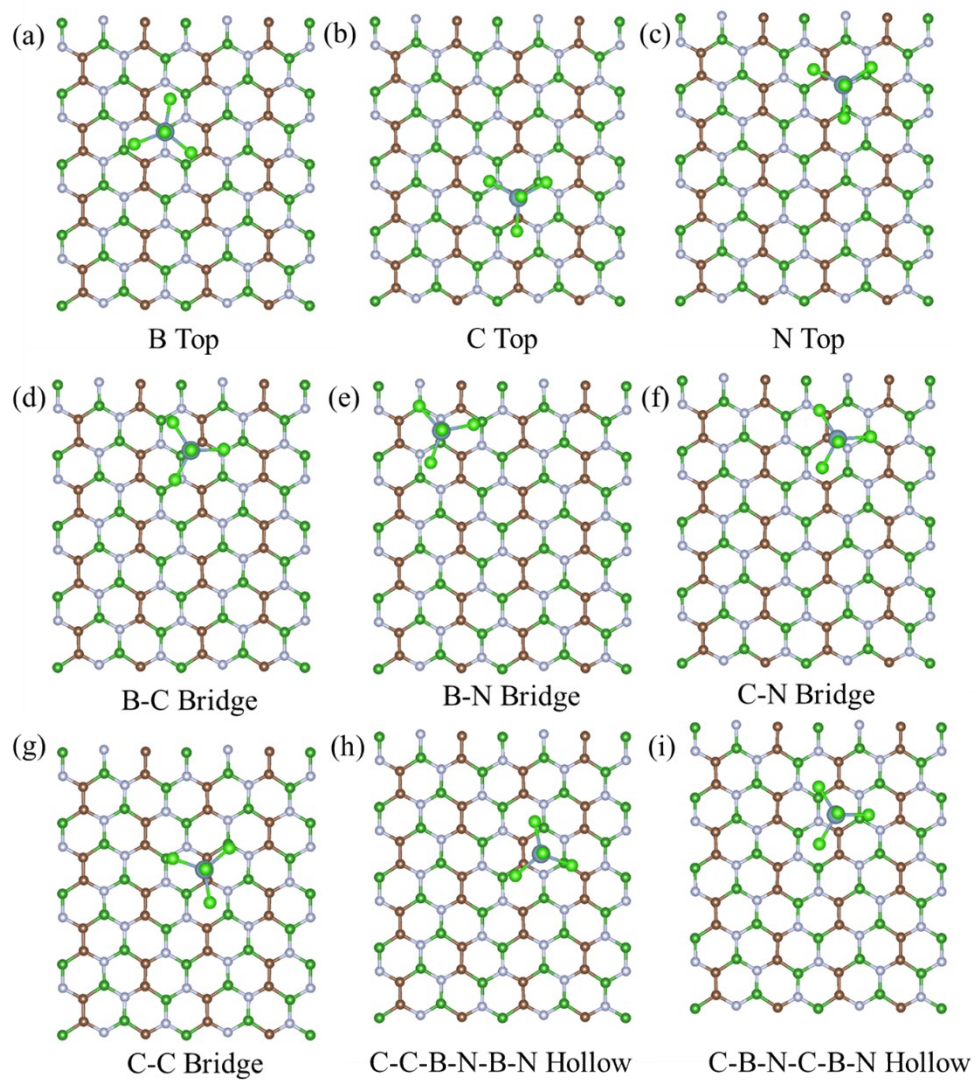

**Fig. S2** Top view of the  $\text{AlCl}_4$  adsorbed BCN monolayer at (a) B Top, (b) C Top, (c) N Top, (d) B-C Bridge, (e) B-N Bridge, (f) C-N Bridge, (g) C-C Bridge, (h) C-C-B-N-B-N Hollow and (i) C-B-N-C-B-N Hollow sites.

**Table S1** The relative adsorption energy of  $\text{AlCl}_4$  for all possible adsorption sites available and the average distance of Al of the adsorbed  $\text{AlCl}_4$  from BCN monolayer at each site.

| Sites |                    | Relative Adsorption energy (eV) | Average Distance ( $\text{\AA}$ ) |
|-------|--------------------|---------------------------------|-----------------------------------|
| 1     | B Top              | 0.03                            | 3.91                              |
| 2     | C Top              | 0.02                            | 3.88                              |
| 3     | N Top              | 0.04                            | 3.97                              |
| 4     | B-C Bridge         | 0.06                            | 3.88                              |
| 5     | B-N Bridge         | 0.02                            | 3.93                              |
| 6     | C-N Bridge         | 0.03                            | 3.89                              |
| 7     | C-C Bridge         | 0.01                            | 3.87                              |
| 8     | C-C-B-N-B-N Hollow | 0.00                            | 3.85                              |
| 9     | C-B-N-C-B-N Hollow | 0.03                            | 3.90                              |

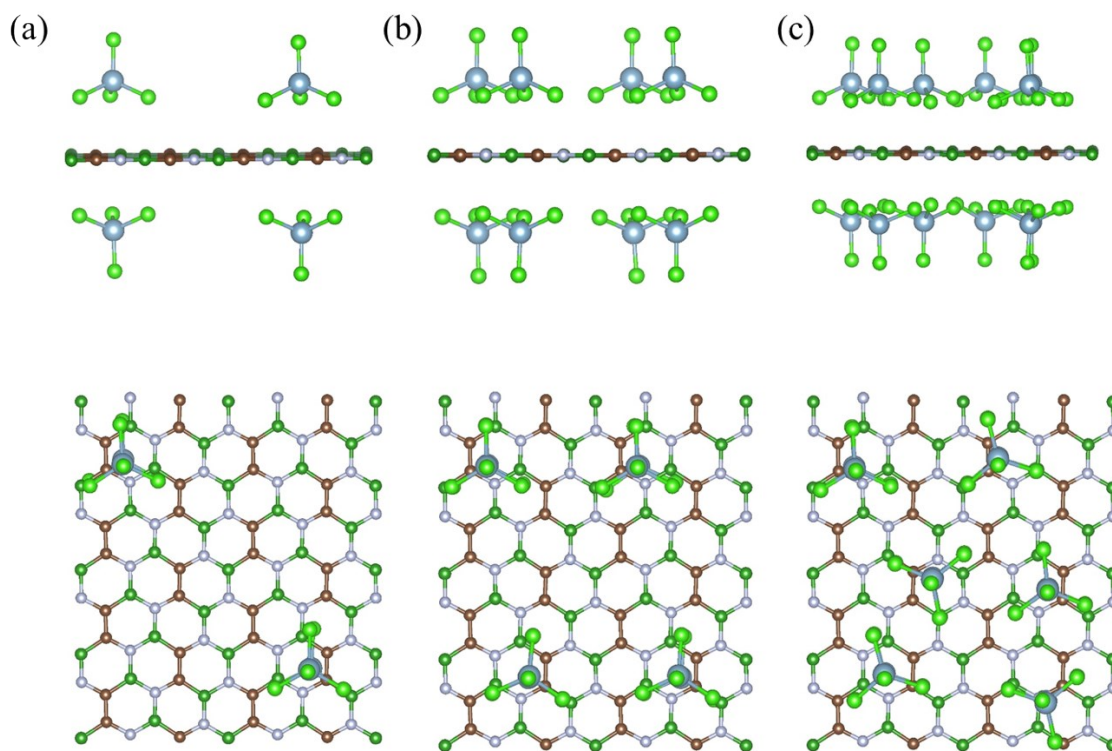

**Fig. S3** Side and top views of the most stable configuration of  $\text{AlCl}_4$  adsorbed BCN monolayer at different  $\text{AlCl}_4$  concentrations (a)  $(\text{AlCl}_4)_4\text{BCN}$  (b)  $(\text{AlCl}_4)_8\text{BCN}$  (c)  $(\text{AlCl}_4)_{12}\text{BCN}$ .

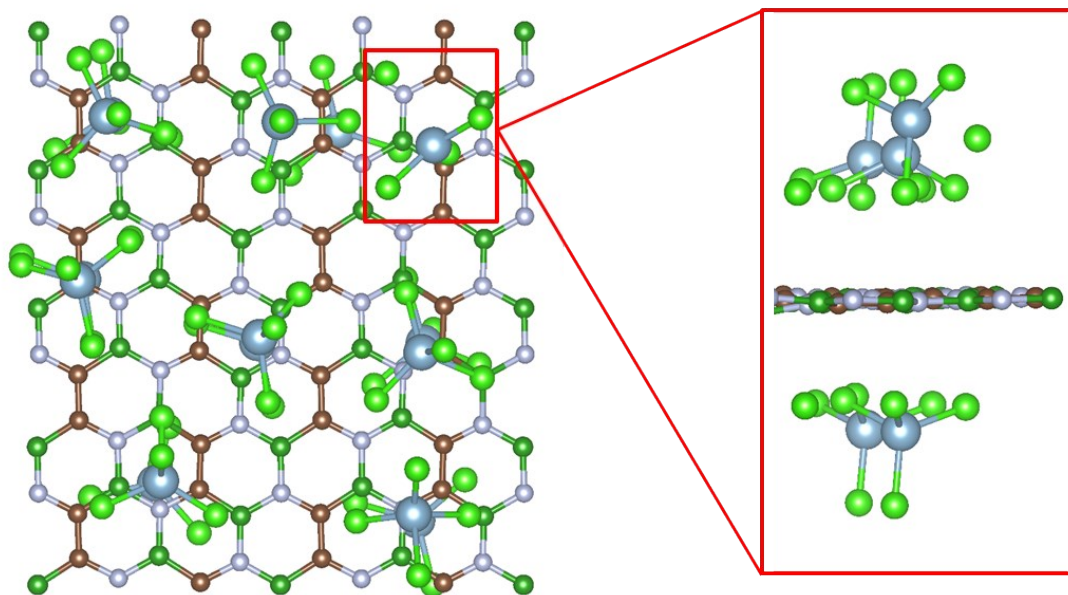

**Fig. S4** Top view of the optimized configuration of 15  $\text{AlCl}_4$  absorbed BCN monolayer. Inset figure showing side view of  $\text{AlCl}_4$  dissociation.



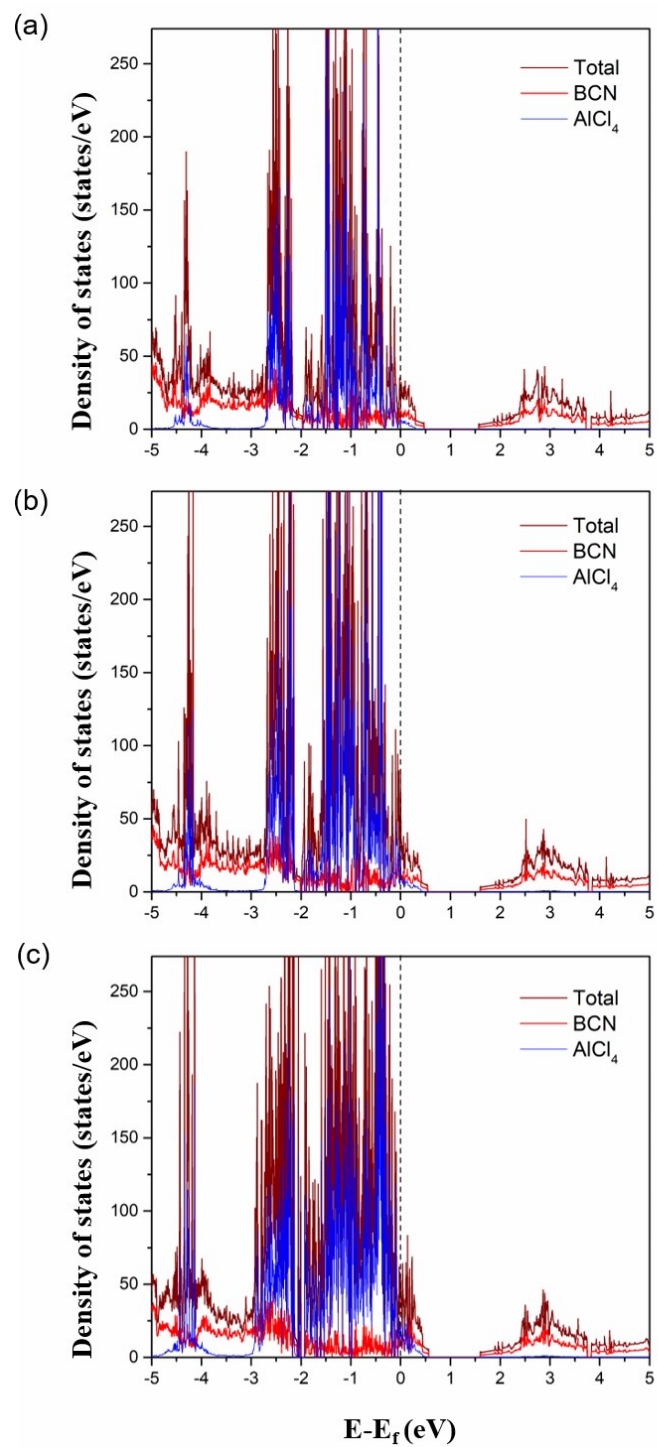

**Fig. S5** Total and partial density of states of (a) 7  $\text{AlCl}_4$  adsorbed BCN monolayer, (b) 10  $\text{AlCl}_4$  adsorbed BCN monolayer, (c) 14  $\text{AlCl}_4$  adsorbed BCN monolayer. The Fermi level is set at zero.



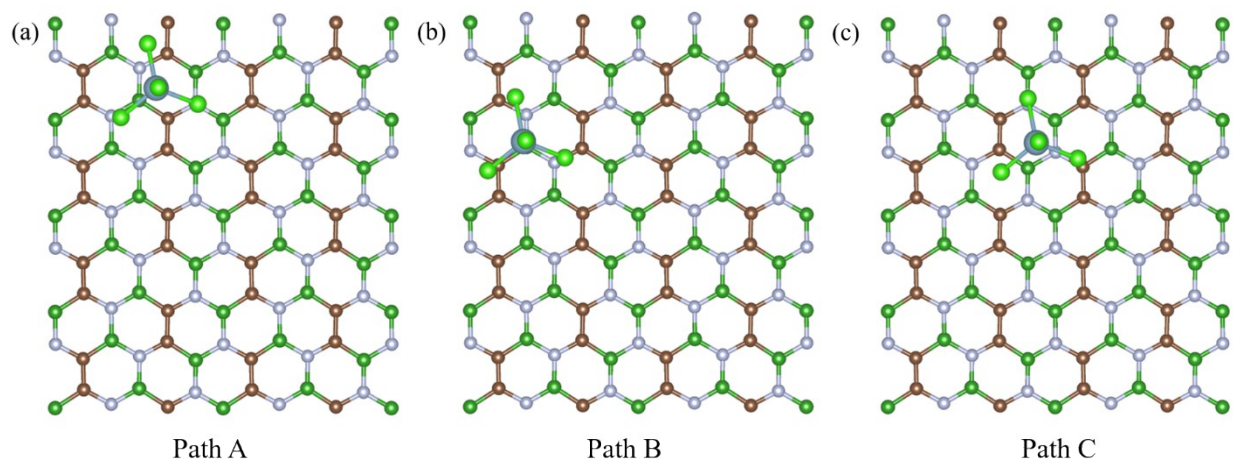

**Fig. S6** The optimized highest energy transition states for different possible pathways, (a) Path A, (b) Path B, (c) Path C, available for  $\text{AlCl}_4$  diffusion.
